# Supplementary material
Source: MDPI journal article supplement (https://www.mdpi.com/2227-9717/12/3/434)

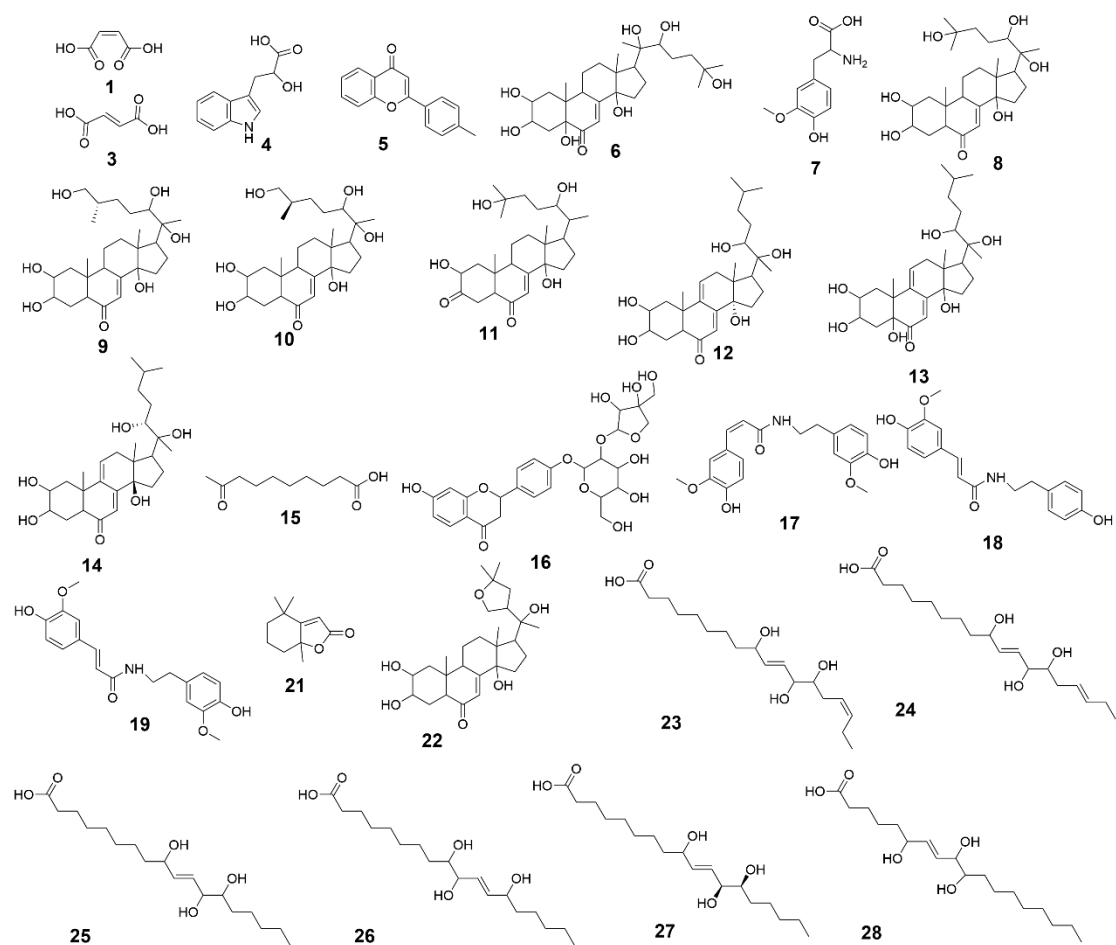

Figure S1. Chemical structures of the identified compounds

Supplement: s1 [file s1 › processes-2864766-supplementary.pdf]
